# Supplementary material for: Monilinia fructigena Suppressing and Plant Growth Promoting Endophytic Pseudomonas spp. Bacteria Isolated from Plum
Source: MDPI journal article supplement (doi:10.3390/microorganisms10122402), 2022-12-03
Supplement: s1 [file s1]

## Supplementary Materials

### *Monilinia fructigena* Suppressing and Plant Growth Promoting Endophytic *Pseudomonas* spp. Bacteria Isolated from Plum

Augustina Kolytaitė<sup>1</sup>, Dorotėja Vaitiekūnaitė<sup>2</sup>, Raminta Antanyrienė<sup>1</sup>, Danas Baniulis<sup>1,\*</sup> and Birutė Frercks<sup>1</sup>

<sup>1</sup>Institute of Horticulture, Lithuanian Research Centre for Agriculture and Forestry, Kaunas Str. 30, Babtai 54333, Kaunas reg., Lithuania; <sup>2</sup>Institute of Forestry, Lithuanian Research Centre for Agriculture and Forestry, Liepu Str. 1, Girionys 53101, Kaunas reg., Lithuania

\* Correspondence: danas.baniulis@lammc.lt

**Table S1.** Physiological test results of biofilm formation, catalase and oxidase production, oxygen requirement and antibiotic susceptibility against ampicillin (AM), cefotaxime (CTX), chloramphenicol (C), kanamycin (K), streptomycin (STP), ticarcillin (TIC).

| Morphotype | Sub-morphotypes | Isolate                                | Antibiotic susceptibility test |        |      |      |        |        | Biofilm formation | Catalase test | Oxidase test | Thioglycolate test |
|------------|-----------------|----------------------------------------|--------------------------------|--------|------|------|--------|--------|-------------------|---------------|--------------|--------------------|
|            |                 |                                        | AM-10                          | CTX-30 | C-30 | K-30 | STP-10 | TIC-75 |                   |               |              |                    |
| A          | A1              | <i>Pseudomonas graminis</i> , SENP33   | R*                             | I      | I    | S    | S      | R      | weak              | +             | -            | Obligate aerobe    |
|            |                 | <i>Pseudomonas graminis</i> , SENP33v2 | R                              | I      | I    | S    | S      | R      | weak              | +             | -            | Obligate aerobe    |
|            | A2              | <i>Pseudomonas graminis</i> , SENP55   | R                              | I      | S    | S    | S      | R      | moderate          | +             | -            | Obligate aerobe    |
| B          | B               | <i>Pseudomonas congelans</i> , SENP53  | I                              | I      | S    | S    | S      | S      | weak              | +             | -            | Obligate aerobe    |
| C          | C               | <i>Pseudomonas graminis</i> , SENP58v2 | R                              | S      | S    | S    | S      | R      | weak              | +             | -            | Obligate aerobe    |
| D          | D1              | <i>Pseudomonas amygdali</i> , SENP41   | R                              | I      | S    | S    | S      | S      | weak              | +             | -            | Obligate aerobe    |
|            | D2              | <i>Agrobacterium fabrum</i> , SENP78   | R                              | I      | I    | I    | R      | I      | weak              | +             | +            | Obligate aerobe    |
|            |                 | <i>Agrobacterium fabrum</i> , SENP81   | R                              | I      | I    | I    | R      | I      | weak              | +             | +            | Obligate aerobe    |

\* R – resistant, I – intermediate, S – sensitive.
